# Supplementary material
Source: PubMed Central journal article supplement (PMC5885827)

## Supplementary Online Content

de Boer M, Van Leeuwen FE, Hauptmann M, et al. Breast implants and the risk of anaplastic large-cell lymphoma in the breast [published online January 4, 2017]. *JAMA Oncol*. doi:10.1001/jamaoncol.2017.4510

### **eMethods.**

### **eResults.**

### **eReferences.**

### **Supplementary legends to the eFigures.**

**eTable 1.** Implant characteristics of 32 patients with breast-ALCL with breast implants

**eTable 2.** Clinical characteristics and treatment of 43 patients with breast-ALCL with and without breast implants

**eTable 3.** Clinicopathological characteristics of 32 patients with breast-ALCL with breast implants, diagnosed between 1990 and 2016

**eFigure 1.** Selection strategy of histologically or cytologically-proven primary non-Hodgkin lymphoma (NHL) of the breast in female patients diagnosed in the Netherlands between 1990-2016

**eFigure 2.** Assessment of breast implant prevalence in the Netherlands in 2015, by A: Regional breast implant prevalence in 2015 in women between 20-70 as estimated from 3,000 chest X-rays in two large regional medical centers in the East and South of the Netherlands, B: Region-specific breast implant prevalence rates from the National Breast Cancer Screening Program (BCSP) and C: Derived estimation of breast implant prevalence in the Netherlands in 2015 in women between 20-70

**eFigure 3.** Estimated number of breast implants sold in the Netherlands by calendar year

**eFigure 4.** Incidence of breast-ALCL in patients with breast implants and reasons for breast implantation

**eFigure 5.** Sales data of breast implants in the Netherlands between 2010 and 2015 by A: surface properties and B: filling properties

This supplementary material has been provided by the authors to give readers additional information about their work.

### **Table of content**

#### **1. eMethods**

- 2. eResults**
- 3. References**
- 4. Supplementary legends to the eFigures**
- 5. eTables 1, 2 & 3 and eFigures 1, 2a, 2b, 2c, 3, 4, 5a & 5b**

## **1. eMethods:**

### **1. Pathology review**

All cytological preparations and histological biopsy and excision samples of potential breast-ALCL were reviewed by an experienced hematopathologist (DDJ). In all cases, CD30 and T-cell markers to support a T-cell immunophenotype were available. With sufficient material available to complete immunohistochemical evaluation, at least CD30, CD2, CD3, CD4, CD8, TIA1, granzyme B, ALK1, EBER and CD20 were included, and in selected cases molecular analysis (T-cell receptor rearrangement analysis according to standard BI-OMED2 technology) was performed.<sup>28,29</sup> Local disease status was classified according to Clemens et al.<sup>30</sup>

### **2. Case-control selection**

Via the nationwide network and registry of histo- and cytopathology in the Netherlands (PALGA) we identified 782 female patients diagnosed with a histologically or cytologically-proven non-Hodgkin lymphoma (NHL) of the breast in the Netherlands during 1990-2016.

For the period between 1990 and 2005, 398 eligible female patients, and for the period between 2006 and 2016, 384 eligible female patients were diagnosed. Of 782 subjects, only patients classified as anaplastic large cell lymphoma for the case group, and diffuse large B-cell lymphoma, Burkitt lymphoma, follicular lymphoma, nodal and mucosa-associated lymphoid tissue-type marginal zone lymphoma, and peripheral T-cell lymphoma not otherwise specified for the control group were included. 220 subjects were excluded based on other lymphoma types, including chronic lymphocytic leukemia and acute lymphoblastic leukemias as disseminated diseases per definition. Of the remaining 562 subjects, 325 were not confirmed as primary breast located lymphomas.

In the case group, 47 cases were selected; 4 were excluded since the breast was not confirmed as primary lymphoma location. In the control group, 190 controls were selected; 27 were excluded since the breast could not be confirmed as primary lymphoma location, 15 controls were missing due to non-responding physicians, and 2 controls were lost to follow-up in medical follow-up records.

For the period between 1990 and 2005, eleven patients with breast-ALCL, among whom 5 with an implant, and 35 controls with non-Hodgkin lymphoma other than breast-ALCL, among whom 1 with an implant, were previously reported in our earlier study.<sup>4</sup> Subsequently, 32 breast-ALCL cases, among whom 27 with an implant, and 110 controls among whom 1 with a breast implant (contralateral, non-lymphoma-affected), were diagnosed between 2006-2016 (Table 1). Seventy-seven % of breast-ALCL cases was identified between 2006-2016, implying a substantially increased incidence (eFigure 4).<sup>4</sup>

### **3. Estimation of the prevalence of women with breast implants**

We assessed the point prevalence of breast implants per 10-year age group in the general female population in 2015 based on evaluation of 3000 chest X-rays in two cohorts of female patients (20-70 years), and we used the differences in region-specific breast implant prevalence from the BCSP (Breast Cancer Screening Program) to derive a national breast implant prevalence (eFigure 2). The cohorts originated from two regional hospitals in the Netherlands (Maastricht University Medical Centre, Maastricht and Medical Spectrum Twente, Enschede). The validity (sensitivity and specificity) of this method was first examined in a separate validation study using a series of 180 X-rays, alternately positively (n=60) or negatively confirmed (n=120) for the presence of a breast implant by a simultaneously performed CT-scan. CT-scans demonstrating a breast implant were identified by a digital search of radiology reports of the Medical Spectrum Twente radiology database. Inter-observer reproducibility of eight blinded reviewers, including two specialized breast radiologists, two plastic surgeons, two plastic surgery residents, and two medical students, were assessed. Five out of eight reviewers completed the validation study satisfactorily with a median sensitivity of 72% (range 70-77%) and a median specificity of 94% (range 82-96%), of whom three were selected to participate in the prevalence study. To further improve specificity in the actual prevalence study, in case of discordance between two independent reviewers, consensus was reached during a specific reviewers' meeting. Sales data from 2010-2015 were provided by all currently active breast implant vendors on the Dutch market, representing >95% of the total market share for this period. After exclusion of the component of tissue expanders (temporary implants used as a first-stage prior to definitive breast reconstruction with a permanent breast implant), market shares per vendor were determined. Data prior to 2010 was not considered sufficiently reliable to reflect the breast implant market, since sales data from various breast implant vendors, active prior to 2010, were unavailable, due to bankruptcy or retraction of companies and introduction of others, resulting in major variations in the market.

Subsequently, we determined the average annual percentage change (AAPC) of implant sales during the period with available data (2010-2015) by regressing the log-transformed number of sold implants per year on calendar year.<sup>14</sup> This estimated AAPC was used to extrapolate the number of sold implants in 2016. Corresponding numbers for the period 1965-2009 were extrapolated by applying an AAPC to the empirical 2010 data, which results in virtually no sold implants in 1965, the year the first implant was used in the Netherlands.

The change in implant prevalence by calendar year was determined by using the AAPCs for the period 1965-2016, and by using the age-specific size of the female Dutch population from Statistics Netherlands (CBS), resulting in the estimation of the prevalence of women with breast implants for the period 1965-2016.

#### **4. Calculation of cumulative risk**

The cumulative risk for breast-ALCL by age in the general female population, as well as in women with breast implants, was calculated using the number of breast-ALCL cases in the general female population, as well as breast-ALCL cases in women with breast implants from PALGA. The age-specific size of the general female Dutch population was obtained from Statistics Netherlands (CBS)<sup>15</sup>, the age-specific size of the female population with breast implants was obtained as described in Supplementary methods 3. Cumulative risk to develop breast-ALCL up to age  $z$  was calculated as  $P_{\text{cri}} = 1 - \exp(-\sum_x I_x \cdot c_x / n_x)$  where  $c_x$  and  $n_x$  are the numbers of cases and person-years in age-category  $x$ , respectively,  $I_x$  is the width of the age interval and  $z$  is the upper limit of the last age category.<sup>16</sup> For breast-ALCL risk in the general female population, cut-offs for age categories were 35, 45, 55, 65 and 75 years. For breast-ALCL risk among women with breast implants, cut-offs were 30, 40, 50, 60 and 70 years.

## **2. eResults**

### **1. Lymphoma characteristics of breast-ALCL cases**

#### **Exposed breast-ALCL cases**

Thirty-two breast-ALCL patients were diagnosed between 1997 and 2016 at a median age of 56 years (range 29-73). Primary breast lymphoma was defined as 1) the dominant primary or main symptomatic location in the breast OR 2) the breast lesion the dominant site of involvement on PET-PDG scanning. Twenty-one patients presented with stage I, 5 patients presented with stage II, 3 with stage III, and 3 with stage IV disease.

In 15 patients, large polymorphous lymphoid cells were restricted to the seroma space (T1, according to Clemens *et al.*)<sup>30</sup>, in 5 patients additionally minor infiltrative foci were noted in the periprosthetic fibrous capsule (T2). Twelve patients presented with a tumorous mass with infiltration into the breast parenchyma (T3/T4) and histological features as in non-implant-associated patients. In all cases, expression of CD30 was uniform and ALK1 was negative. A T-cell phenotype based on expression of at least one T-cell marker (CD3, CD2, CD5, CD7, CD4, CD8, GB7, TIA1) in the absence of B-cell marker expression (CD20, CD79a, PAX5) was confirmed.

#### **Non-exposed breast-ALCL cases**

Eleven primary breast-ALCL patients without an implant were diagnosed between 1994 and 2010 at a median age of 61 years (range 24-87). Primary breast lymphoma was defined as above. In all patients, ALCL, ALK- was confirmed according to the criteria of the WHO classification using morphological and immunohistochemical markers as above and presented as a tumorous infiltrate in the breast parenchyma (T4).<sup>7,30</sup>

### **2. Contralateral breast surgery in exposed breast-ALCL cases**

In all patients except one, the implant at the affected side was removed together with the surrounding fibrous capsule. In 18 of 26 patients with bilateral implants, removal of the contralateral implant was performed, for which all patients except one received a contralateral capsulectomy. Eleven patients received no further treatment; the remaining patients received various chemotherapy regimens.

### 3. References

4. De Jong D, Vasmel WL, de Boer JP et al. Anaplastic large-cell lymphoma in women with breast implants. *JAMA* 2008;300(17):2030-5.
7. Swerdlow SH, Campo E, Pileri SA et al. The 2016 revision of the World Health Organization classification of lymphoid neoplasms. *Blood* 2016;127(20):2375-90.
14. Kim HJ, Fay MP, Feuer EJ, Midthune DN. Permutation tests for join-point regression with applications to cancer rates. *Stat Med*. 2000;19(3):335-51.
15. Population in the Netherlands; by sex and age and marital status, 1 January, 1950-2016. Heerlen, the Netherlands: Statistics Netherlands, 2017. <http://statline.cbs.nl/Statweb/>. Accessed Februari 13, 2017.
16. Schouten LJ, Straatman H, Kiemeny LALM, Verbeek ALM. Cancer Incidence: life time risk versus cumulative risk. *J Epidemiol Community Health*. 1994;48(6):596-600
28. van Krieken JH, Langerak AW, Macintyre EA, et al. Improved reliability of lymphoma diagnostics via PCR-based clonality testing: report of the BIOMED-2 Concerted Action BHM4-CT98-3936. *Leukemia*. 2007;21(2):201-6
29. Evans PA, Pott Ch, Groenen PJ, et al. Significantly improved PCR-based clonality testing in B-cell malignancies by use of multiple immunoglobulin gene targets. Report of the BIOMED-2 Concerted Action BHM4-CT98-3936. *Leukemia*. 2007;21(2):207-14.
30. Clemens MW, Medeiros LJ, Butler CE et al. Complete Surgical Excision Is Essential for the Management of Patients With Breast Implant-Associated Anaplastic Large-Cell Lymphoma. *J Clin Oncol*. 2016;34(2):160-8.

#### 4. Supplementary legends to the eFigures

##### **eFigure 1: Selection strategy of histologically or cytologically-proven primary non-Hodgkin lymphoma (NHL) of the breast in female patients diagnosed in the Netherlands between 1990-2016.**

Initially, 782 patients for whom no previous lymphoma diagnosis was listed prior to breast lymphoma were identified. Of these 47 were diagnosed as ALCL and 190 as diffuse large B-cell lymphoma, Burkitt lymphoma, follicular lymphoma, nodal and mucosa-associated lymphoid tissue-type marginal zone lymphoma and peripheral T-cell lymphoma not otherwise specified and considered for this study. Of these, 59 patients were further excluded since primary breast localization could not be confirmed based on present clinical criteria and/or lack of sufficient clinical information thereof. Primary breast lymphoma was defined as 1) the dominant primary or main symptomatic location in the breast OR 2) the breast lesion the dominant site of involvement on PET-PDG scanning.

##### **eFigure 2: Assessment of breast implant prevalence in the Netherlands in 2015, by A: Regional breast implant prevalence in 2015 in women between 20-70 as estimated from 3,000 chest X-rays in two large regional medical centers in the East and South of the Netherlands, B: Region-specific breast implant prevalence rates from the National Breast Cancer Screening Program (BCSP) and C: Derived estimation of breast implant prevalence in the Netherlands in 2015 in women between 20-70**

Part A shows breast implant point prevalence derived from the chest X-ray study performed in two regional referral hospitals in the Eastern and Southern regions of the Netherlands in women between 20-70 years old. Part B shows region-specific breast implant prevalence rates from the National Breast Cancer Screening Program (BCSP). In part C, national breast implant prevalence in the Netherlands is shown, derived by combining differences in region-specific breast implant prevalence from the BCSP and regional point prevalences from the chest X-ray study (part A and part B).

##### **eFigure 3: Estimated number of breast implants sold in the Netherlands by calendar year.**

The average annual percentage change (AAPC) of sold breast implants between 2010-2015 (covering >95% of all sold breast implants) was used to extrapolate to the periods 1965-2009 (1965 as the year of the first implant used), and 2015-2016.

##### **eFigure 4: Incidence of breast-ALCL in patients with breast implants and reasons for breast implantation**

The incidence of breast-ALCL in patients with breast implants shows a strong increase between 1997 and 2016, most prominent after 2012. This increase may be caused by a higher frequency of breast-ALCL, or may in part be related to increased awareness of medical professionals and women with breast implants.

##### **eFigure 5: Sales data of breast implants in the Netherlands between 2010 and 2015 by A: surface properties and B: filling properties.**

Sales data were obtained from four manufactures (Allergan, Mentor, Polytech, Eurosilicone) active in the Dutch market between 2010 and 2015. This information covers approximately 95% of the market share in the Netherlands for the period of 2010-2015. Of one complying company, data were received for the period from 1995 to 2015, of one company for the period from 2009 to 2015, of one company for the period from 2007 to 2015 and of one company, who has only recently entered the Dutch market, from 2013-2015. Virtually no smooth and polyurethane implants or non-silicone filled implants were sold during this period, while macro- and micro-textured implants had largely similar market shares.

5. eTables and eFigures

**eTable 1: Implant characteristics of 32 patients with breast-ALCL with breast implants.**

|                                      |                                              | <b>Breast-ALCL cases (N)</b> |    |
|--------------------------------------|----------------------------------------------|------------------------------|----|
| <b>Year of breast implant</b>        | 1965-1975                                    | 1                            |    |
|                                      | 1976-1985                                    | 4                            |    |
|                                      | 1986-1995                                    | 6                            |    |
|                                      | 1996-2005                                    | 14                           |    |
|                                      | 2006-2015                                    | 7                            |    |
|                                      |                                              |                              |    |
| <b>Age at breast implant (years)</b> | 21-30                                        | 10                           |    |
|                                      | 31-40                                        | 7                            |    |
|                                      | 41-50                                        | 8                            |    |
|                                      | 51-60                                        | 6                            |    |
|                                      | >60                                          | 1                            |    |
|                                      |                                              |                              |    |
| <b>Indications for implants</b>      | Cosmetic                                     | 22                           |    |
|                                      | Reconstruction after breast cancer surgery   | 7                            |    |
|                                      | Reconstruction after prophylactic mastectomy | 3                            |    |
|                                      |                                              |                              |    |
| <b>Type of implant</b>               | Macro-texture                                | Allergan/Inamed/McGhan       | 22 |
|                                      |                                              | Nagor                        | 1  |
|                                      |                                              |                              |    |
|                                      | Microtexture                                 | Eurosilicone                 | 2  |
|                                      |                                              | Mentor                       | 1  |
|                                      |                                              | PIP                          | 1  |
|                                      |                                              | Sebbin                       | 1  |
|                                      |                                              |                              |    |
|                                      |                                              |                              |    |



|                                                                                                                 |                       |                      |    |
|-----------------------------------------------------------------------------------------------------------------|-----------------------|----------------------|----|
|                                                                                                                 | Unknown               |                      | 4  |
|                                                                                                                 |                       |                      |    |
| <b>Side of implant</b>                                                                                          | Unilateral            |                      | 5  |
|                                                                                                                 | Bilateral             |                      | 27 |
|                                                                                                                 |                       |                      |    |
| <b>Interval between first implant and ALCL diagnosis (years) (median interval 13 years, range (1-39 years))</b> | 1-5                   |                      | 6  |
|                                                                                                                 | 6-10                  |                      | 5  |
|                                                                                                                 | 11-20                 |                      | 14 |
|                                                                                                                 | 21-30                 |                      | 5  |
|                                                                                                                 | 31-40                 |                      | 2  |
|                                                                                                                 |                       |                      |    |
| <b>Number of implant revisions</b>                                                                              | None                  |                      | 21 |
|                                                                                                                 | Single                |                      | 3  |
|                                                                                                                 | Multiple              |                      | 8  |
|                                                                                                                 |                       |                      |    |
| <b>Indications for last revisional surgery</b>                                                                  | Capsular contraction  |                      | 4  |
|                                                                                                                 | Periprosthetic seroma | Inflammation-related | 2  |
|                                                                                                                 |                       | Lymphoma-related     | 2  |
|                                                                                                                 | Unknown               |                      | 3  |

**eTable 2: Clinical characteristics and treatment of 43 patients with breast-ALCL with and without breast implants.**

|                              |                                                                              | Primary breast ALCL with breast implants (N=32) | Primary breast ALCL without breast implants (N=11) |
|------------------------------|------------------------------------------------------------------------------|-------------------------------------------------|----------------------------------------------------|
| <b>Lymphoma localisation</b> | Unilateral                                                                   | 29                                              | 9                                                  |
|                              | Bilateral                                                                    | 3                                               | 2                                                  |
| <b>Type of ALCL</b>          | Seroma-associated <sup>11</sup>                                              | 18                                              | 0                                                  |
|                              | Mass forming <sup>11</sup>                                                   | 14                                              | 11                                                 |
| <b>Stage</b>                 | I                                                                            | 21                                              | 6                                                  |
|                              | II                                                                           | 5                                               | 2                                                  |
|                              | III                                                                          | 3                                               | 0                                                  |
|                              | IV                                                                           | 3                                               | 3                                                  |
| <b>Treatment</b>             | First line surgical therapy only (excision or capsulectomy and explantation) | 11                                              | 0                                                  |
|                              | First line surgical therapy and chemotherapy and/or radiotherapy             | 12                                              | 10                                                 |
|                              | Second line high dose chemotherapy and hematopoietic stem cell transplant    | 9                                               | 1                                                  |
| <b>Treatment results</b>     | Complete remission on first-line and or second-line treatment                | 29                                              | 8                                                  |
|                              | Partial remission on first line and/or second line treatment                 | 1                                               | 0                                                  |
|                              | Progressive disease                                                          | 2                                               | 3                                                  |
|                              | Local relapse                                                                | 0                                               | 0                                                  |
| <b>Outcome</b>               | Death due to lymphoma                                                        | 2                                               | 3                                                  |
|                              | Death of other causes                                                        | 1                                               | 0                                                  |

|  |                              |    |   |
|--|------------------------------|----|---|
|  | Alive without disease        | 23 | 8 |
|  | Alive under active treatment | 6  | 0 |

**eTable 3: Clinicopathological characteristics of 32 patients with breast-ALCL with breast implants, diagnosed between 1990 and 2016**

| Case | Age at diagnosis of breast-ALCL | Year of diagnosis breast-ALCL | Indication for breast implant | Breast implant side | Implant revision | Breast implant type present at lymphoma diagnosis | Interval between first breast implant and lymphoma diagnosis (years) | Interval between last implant revision and lymphoma diagnosis (years) | Involved lymphoma sites at diagnosis    | Stage at diagnosis | ALCL type: seroma or tumor-forming | TNM    | Treatment                                                      | Outcome  | Follow-up (December 2016, in months) |
|------|---------------------------------|-------------------------------|-------------------------------|---------------------|------------------|---------------------------------------------------|----------------------------------------------------------------------|-----------------------------------------------------------------------|-----------------------------------------|--------------------|------------------------------------|--------|----------------------------------------------------------------|----------|--------------------------------------|
| 1    | 38                              | 1997                          | 1984 Cosmetic augmentation    | Bilateral           |                  | Unknown                                           | 13                                                                   |                                                                       | Left breast                             | II                 | mass                               | T2N0M0 | 7x CAVmP/BV, explantation and capsulectomy after chemotherapy  | CR       | 240                                  |
| 2    | 29                              | 1999                          | 1996 Cosmetic augmentation    | Bilateral           |                  | Nagor, macrotexured, silicone                     | 3                                                                    |                                                                       | Right breast, right axillary lymph node | II                 | mass                               | T2N1M0 | Explantation and capsulectomy bilateral, CHOP 6x, radiotherapy | CR, DOOC | 72                                   |

|   |    |      |                                  |                        |                                                                                                                                           |                                               |    |   |                                                                                                                               |    |      |            |                                                                                                                            |    |     |
|---|----|------|----------------------------------|------------------------|-------------------------------------------------------------------------------------------------------------------------------------------|-----------------------------------------------|----|---|-------------------------------------------------------------------------------------------------------------------------------|----|------|------------|----------------------------------------------------------------------------------------------------------------------------|----|-----|
| 3 | 49 | 2000 | 1977<br>Cosmetic<br>augmentation | Bilat-<br>lat-<br>eral | 1988,<br>1995:<br>reason<br>unknown,<br>new<br>implant<br>unknown<br>1998:<br>reason<br>unknown,<br>new<br>implant<br>McGhan,<br>textured | McGhan,<br>macrotextured,<br>silicone         | 23 | 2 | Bilateral<br>breasts                                                                                                          | II | mass | T2N0<br>M0 | CHOP 3x,<br>radiotherapy, -><br>PR followed by<br>bilateral<br>explantation and<br>capsulectomy,<br>IMVP 2x,<br>BEAM/ASCT, | CR | 204 |
| 4 | 53 | 2001 | 2000<br>Cosmetic<br>augmentation | Bilat-<br>lat-<br>eral |                                                                                                                                           | Rofill PIP<br>Hydrogel,<br>micro-<br>textured | 1  |   | Left breast                                                                                                                   | I  | mass | T2N0<br>M0 | Explantation and<br>capsulectomy                                                                                           | CR | 192 |
| 5 | 43 | 2005 | 1992<br>Cosmetic<br>augmentation | Bilat-<br>lat-<br>eral |                                                                                                                                           | McGhan,<br>macrotextured,<br>silicone         | 13 |   | Right<br>breast,<br>right<br>axillary<br>and<br>infraclavic<br>ular lymph<br>nodes,<br>small<br>bowel,<br>right skull<br>base | IV | mass | T2N2<br>M1 | CHOP 8x,<br>DHAP-VIM-<br>DHAP/MTX,<br>explantation and<br>capsulectomyright                                                | CR | 144 |

|   |    |      |                                  |                        |                                                                                                                                                       |                                                       |    |   |                                                                           |      |                                             |            |                                                                          |    |     |
|---|----|------|----------------------------------|------------------------|-------------------------------------------------------------------------------------------------------------------------------------------------------|-------------------------------------------------------|----|---|---------------------------------------------------------------------------|------|---------------------------------------------|------------|--------------------------------------------------------------------------|----|-----|
| 6 | 47 | 2008 | 1988<br>Cosmetic<br>augmentation | Bilat-<br>lat-<br>eral | 1994:<br>reason<br>unknown,<br>new<br>implant<br>unknown<br>2002:<br>Seroma,<br>new<br>implant<br>McGhan,<br>textured                                 | McGhan,<br>macrotex-<br>tured,<br>silicone            | 20 | 6 | Right<br>breast,<br>thoracic<br>wall, right<br>axillary<br>lymph<br>nodes | IIIE | com-<br>bined<br>sero-<br>ma<br>and<br>mass | T3N2<br>M1 | Explantation and<br>capsulectomy<br>bilateral, CHOP<br>6x, DHAP+<br>ASCT | CR | 108 |
| 7 | 70 | 2010 | 1971<br>Cosmetic<br>augmentation | Bilat-<br>lat-<br>eral | 1994:<br>reason<br>unknown,<br>new<br>implant<br>unknown<br>2002:<br>Seroma,<br>new<br>implant<br>McGhan/I<br>named<br>CML 170,<br>macrotex-<br>tured | Inamed<br>CML 170,<br>macrotex-<br>tured,<br>silicone | 39 | 8 | Right<br>breast,<br>right<br>axillary<br>lymph<br>node                    | IIE  | sero-<br>ma                                 | T1N1<br>M0 | Explantation and<br>capsulectomy                                         | CR | 84  |

|   |    |      |                                                                        |           |                                                                                                                    |                                          |    |   |                                                                                        |     |        |         |                                                                                                               |    |    |
|---|----|------|------------------------------------------------------------------------|-----------|--------------------------------------------------------------------------------------------------------------------|------------------------------------------|----|---|----------------------------------------------------------------------------------------|-----|--------|---------|---------------------------------------------------------------------------------------------------------------|----|----|
| 8 | 54 | 2010 | 1981 Right-sided mastectomy for breast cancer (reconstruction in 1984) | Right     | 1984: Silastic 180 gel silicone filled<br>1995: reason unknown, McGhan 220 cc gell<br>2003: reason unknown, McGhan | McGhan, macro-textured, silicone         | 26 | 7 | Right breast, right axillary and supra/intra-clavicular lymph nodes, sub pleural right | III | seroma | T1N2 M0 | 2010 ABVD, 2011 Explantation and capsulectomy, right, adjuvant chemotherapy (DHAP - VIM - DHAP and BEAM) ASCT | CR | 84 |
| 9 | 45 | 2011 | 2000 Cosmetic augmentation                                             | Bilateral | 2010: Capsular contracture, new implant Mentor Siltex round moderate plus profile                                  | Mentor Siltex, micro-textured, silicone, | 11 |   | Right breast                                                                           | I   | seroma | T1N0 M0 | Explantation and capsulectomy bilateral, CHOP 4, radiotherapy (45Gy)                                          | CR | 70 |

|    |    |      |                                              |           |  |                                               |    |  |                                                          |     |        |        |                                                                   |         |    |
|----|----|------|----------------------------------------------|-----------|--|-----------------------------------------------|----|--|----------------------------------------------------------|-----|--------|--------|-------------------------------------------------------------------|---------|----|
| 10 | 63 | 2011 | 1991 Cosmetic augmentation                   | Bilateral |  | Unknown                                       | 20 |  | Bilateral breasts, mediastinal and abdominal lymph nodes | III | mass   | T4N2M0 | Explantation and capsulectomy, 8 CHOP, DHAP-VIM-VIM, radiotherapy | DO<br>D | 11 |
| 11 | 64 | 2012 | 2001 left-sided mastectomy for breast cancer | Left      |  | McGhan 410 MF 375cc, macro-textured, silicone | 11 |  | Left breast                                              | I   | seroma | T1N0M0 | Explantation and capsulectomy left, explantation right, 6x CHOP   | CR      | 55 |
| 12 | 42 | 2012 | 2004 Cosmetic augmentation                   | Bilateral |  | Unknown                                       | 8  |  | Left breast, upper abdominal lymph node                  | IV  | mass   | T4N1M1 | CHOP 6, BEAM and ASCT                                             | CR      | 54 |



|    |    |      |                                                                                                                 |                            |  |                                                     |    |  |              |   |        |         |                                                    |    |    |
|----|----|------|-----------------------------------------------------------------------------------------------------------------|----------------------------|--|-----------------------------------------------------|----|--|--------------|---|--------|---------|----------------------------------------------------|----|----|
| 13 | 48 | 2012 | 1998 Right-sided mastectomy for breast cancer, 2004 left-sided prophylactic mastectomy (BRCA2 mutation carrier) | 1998 Right, 2004 bilateral |  | McGhan, macro-textured, silicone                    | 14 |  | Left breast  | I | seroma | T1N0 M0 | Explantation and capsulectomy left, CHOP 6x        | CR | 58 |
| 14 | 35 | 2013 | 2008 Cosmetic augmentation                                                                                      | Bilateral                  |  | Eurosilicone type 81 micro-textured, silicone 260cc | 5  |  | Right breast | I | mass   | T4N0 M0 | Explantation and capsulectomy bilateral, cisplatin | CR | 37 |

|    |    |      |                                  |                        |                                                                                                                                                            |                                                              |    |   |                 |    |             |            |                                                                 |    |    |
|----|----|------|----------------------------------|------------------------|------------------------------------------------------------------------------------------------------------------------------------------------------------|--------------------------------------------------------------|----|---|-----------------|----|-------------|------------|-----------------------------------------------------------------|----|----|
| 15 | 67 | 2013 | 1987<br>Cosmetic<br>augmentation | Bilat-<br>lat-<br>eral | 2007:<br>capsular<br>contractur<br>e, new<br>implant<br>Inamed<br>110 330gr<br>2009:<br>capsular<br>contractur<br>e, new<br>implant<br>Inamed<br>110 330gr | Inamed<br>110<br>330gr,<br>macro-<br>textured,<br>silicone   | 26 | 4 | Right<br>breast | I  | sero-<br>ma | T1N0<br>M0 | Explantation and<br>capsulectomy<br>right, 6x CHOP              | CR | 40 |
| 16 | 55 | 2013 | 1987<br>Cosmetic<br>augmentation | Bilat-<br>lat-<br>eral |                                                                                                                                                            | McGhan<br>matrix<br>210cc<br>macro-<br>textured,<br>silicone | 26 |   | Left breast     | IE | mass        | T4N0<br>M0 | Explantation and<br>capsulectomy<br>bilateral + 6<br>CHOP       | CR | 37 |
| 17 | 46 | 2014 | 2000<br>Cosmetic<br>augmentation | Bilat-<br>lat-<br>eral |                                                                                                                                                            | McGhan<br>410<br>245cc,<br>macro-<br>textured,<br>silicone   | 14 |   | Left breast     | IB | sero-<br>ma | T1N0<br>M0 | Explantation<br>right,<br>Explantation and<br>capsulectomy left | CR | 33 |

|    |    |      |                                                                              |                        |                                                                                                                                                             |                                                     |    |   |                                                    |       |             |            |                                                                 |    |    |
|----|----|------|------------------------------------------------------------------------------|------------------------|-------------------------------------------------------------------------------------------------------------------------------------------------------------|-----------------------------------------------------|----|---|----------------------------------------------------|-------|-------------|------------|-----------------------------------------------------------------|----|----|
| 18 | 40 | 2014 | 2002<br>Cosmetic<br>augmentation                                             | Bilat-<br>lat-<br>eral |                                                                                                                                                             | McGhan<br>120cc,<br>macro-<br>texture,<br>silicone, | 12 |   | Left<br>breast, left<br>axillary<br>lymph<br>nodes | IIA-E | mass        | T4N2<br>M0 | Explantation and<br>capsulectomy<br>bilateral, CHOP 5<br>DHAP 1 | CR | 5  |
| 19 | 72 | 2014 | 1977<br>Cosmetic<br>augmentation<br>using<br>unknown<br>type                 | Bilat-<br>lat-<br>eral | Multiple<br>revisions:<br>years and<br>reasons<br>unknown<br>2009:<br>capsular<br>contractur<br>e left, new<br>implant<br>McGhan<br>Cohesive<br>Gel Biocell | McGhan,<br>macro-<br>textured,<br>silicone          | 37 | 5 | Left breast                                        | I     | sero-<br>ma | T1N0<br>M0 | Explantation and<br>capsulectomy left                           | CR | 26 |
| 20 | 56 | 2014 | 2002<br>prophyla<br>ctic<br>mastecto<br>my<br>(BRCA1<br>mutation<br>carrier) | Bilat-<br>lat-<br>eral |                                                                                                                                                             | Allergan,<br>macro-<br>textured<br>silicone         | 12 |   | Right<br>breast                                    | I     | sero-<br>ma | T1N0<br>M0 | Explantation and<br>capsulectomy<br>bilateral                   | CR | 25 |

|    |    |      |                                                                                                                                     |                        |  |                                                          |   |  |                 |    |             |            |                                                                |    |    |
|----|----|------|-------------------------------------------------------------------------------------------------------------------------------------|------------------------|--|----------------------------------------------------------|---|--|-----------------|----|-------------|------------|----------------------------------------------------------------|----|----|
| 21 | 57 | 2014 | 2005<br>Cosmetic<br>augmentation                                                                                                    | Bilat-<br>lat-<br>eral |  | Eurosilico<br>ne,<br>micro-<br>textured,<br>silicone     | 9 |  | Right<br>breast | IE | sero-<br>ma | T1N0<br>M0 | Bilateral<br>explantation and<br>capsulectomy,ra<br>diotherapy | PR | 33 |
| 22 | 57 | 2014 | 2008<br>Right-<br>sided<br>mastecto<br>my for<br>breast<br>cancer,<br>2014 left-<br>sided<br>mastecto<br>my for<br>breast<br>cancer | Bilat-<br>lat-<br>eral |  | Allergan<br>type 410,<br>macro-<br>textured,<br>silicone | 6 |  | Right<br>breast | IE | mass        | T3N0<br>M0 | Explantation and<br>capsulectomy,<br>CHOP 3x,<br>radiotherapy  | CR | 32 |

|    |    |      |                                                                                                                         |           |                                                                                                                    |                                         |    |         |                                         |    |        |         |                                                                        |    |    |
|----|----|------|-------------------------------------------------------------------------------------------------------------------------|-----------|--------------------------------------------------------------------------------------------------------------------|-----------------------------------------|----|---------|-----------------------------------------|----|--------|---------|------------------------------------------------------------------------|----|----|
| 23 | 56 | 2015 | 2010 Right-sided mastectomy for breast cancer, left-sided prophylactic mastectomy (familial cancer, no proven mutation) | Bilateral | 2011: Infection, new implant McGhan Mx 550<br>2015: Seroma (cytological ALCL diagnosis), new implant McGhan Mx 620 | McGhan 620 Mx, macro-textured, silicone | 5  | 1 month | Left breast                             | I  | seroma | T1N0 M0 | Explantation and capsulectomy bilateral, radiotherapy (30 Gy)          | CR | 16 |
| 24 | 43 | 2015 | 1993 Cosmetic augmentation                                                                                              | Bilateral |                                                                                                                    | Unknown                                 | 22 |         | Right breast, right axillary lymph node | IA | mass   | T4N1 M0 | Explantation and capsulectomy bilateral, 6x CHOP, radiotherapy (40 Gy) | CR | 22 |
| 25 | 73 | 2015 | 2003 Right-sided mastectomy for breast cancer                                                                           | Right     |                                                                                                                    | McGhan 410, macro-textured, silicone    | 12 |         | Right breast                            | I  | seroma | T1N0 M0 | Explantation and capsulectomy                                          | CR | 15 |

|    |    |      |                                                                                                                   |           |                                                                             |                                               |    |  |             |   |                          |         |                                        |    |    |
|----|----|------|-------------------------------------------------------------------------------------------------------------------|-----------|-----------------------------------------------------------------------------|-----------------------------------------------|----|--|-------------|---|--------------------------|---------|----------------------------------------|----|----|
| 26 | 64 | 2016 | 2012 Left-sided mastectomy for breast cancer, right-sided prophylactic mastectomy (proven BRCA1 mutation carrier) | Bilateral | 2016: Periprosthetic seroma left, new implant Allergan Cohesive Gel Blocell | Allergan, macro-textured, silicone            | 4  |  | Left breast | I | combined seroma and mass | T3N0 M0 | Explantation and capsulectomy          | CR | 6  |
| 27 | 56 | 2016 | 2006 Cosmetic augmentation                                                                                        | Bilateral |                                                                             | Allergan 495 cc 410, macro-textured, silicone | 10 |  | Left breast | I | seroma                   | T1N0 M0 | Explantation and capsulectomy, CHOP 6x | CR | 9  |
| 28 | 59 | 2016 | 2003 Left-sided mastectomy for breast cancer                                                                      | Left      |                                                                             | Inamed, macro-textured, silicone              | 13 |  | Left breast | I | mass                     | T4N0 M0 | Explantation and capsulectomy          | CR | 12 |

|    |    |      |                                                                  |                        |                                                                                                                                                                         |                                                                   |    |   |             |   |             |            |                                  |    |   |
|----|----|------|------------------------------------------------------------------|------------------------|-------------------------------------------------------------------------------------------------------------------------------------------------------------------------|-------------------------------------------------------------------|----|---|-------------|---|-------------|------------|----------------------------------|----|---|
| 29 | 56 | 2016 | 1998<br>Cosmetic<br>augmentation                                 | Bilat-<br>lat-<br>eral | 2000: pain<br>(new<br>implant<br>Rofill high<br>cohesive<br>textured)<br>2012:<br>rupture<br>and<br>capsular<br>contractur<br>e (new<br>implant<br>Allergan<br>Inspira) | Allergan<br>Natrell<br>Inspira<br>macro-<br>textured,<br>silicone | 18 | 4 | Left breast | I | sero-<br>ma | T1N0<br>M0 | Explantation and<br>capsulectomy | CR | 5 |
| 30 | 60 | 2016 | 2009<br>Left-<br>sided<br>mastecto<br>my for<br>breast<br>cancer | Left                   |                                                                                                                                                                         | McGhan,<br>macro-<br>textured,<br>silicone                        | 7  |   | Left breast | I | mass        | T4N1<br>M0 | Explantation and<br>capsulectomy | CR | 2 |

|    |    |      |                                  |                        |                                                                                                                                    |                                                      |    |  |                                                                       |    |      |            |                                                         |    |   |
|----|----|------|----------------------------------|------------------------|------------------------------------------------------------------------------------------------------------------------------------|------------------------------------------------------|----|--|-----------------------------------------------------------------------|----|------|------------|---------------------------------------------------------|----|---|
| 31 | 48 | 2016 | 2012<br>Cosmetic<br>augmentation | Bilat-<br>lat-<br>eral | 2015:<br>Periprosthetic<br>seroma<br>left, new<br>implant<br>Sebbin<br>LSC 72<br>330<br>(cytological<br>diagnosis<br>inconclusive) | Sebbin<br>330 gr,<br>micro-<br>textured,<br>silicone | 4  |  | Left breast                                                           | I  | mass | T1N0<br>M0 | Explantation and<br>capsulectomy                        | CR | 5 |
| 32 | 56 | 2016 | 2001<br>Cosmetic<br>augmentation | Bilat-<br>lat-<br>eral |                                                                                                                                    | McGhan,<br>macro-<br>textured,<br>silicone           | 15 |  | Left and<br>right<br>breast,<br>abdominal<br>lymphadenopathy,<br>bone | IV | mass | T3N2<br>M1 | Explantation and<br>capsulectomy,<br>CHOEP 6x +<br>ASCT | CR | 2 |



eFigure 1: Selection strategy of histologically or cytologically-proven primary non-Hodgkin lymphoma (NHL) of the breast in female patients diagnosed in the Netherlands between 1990-2016

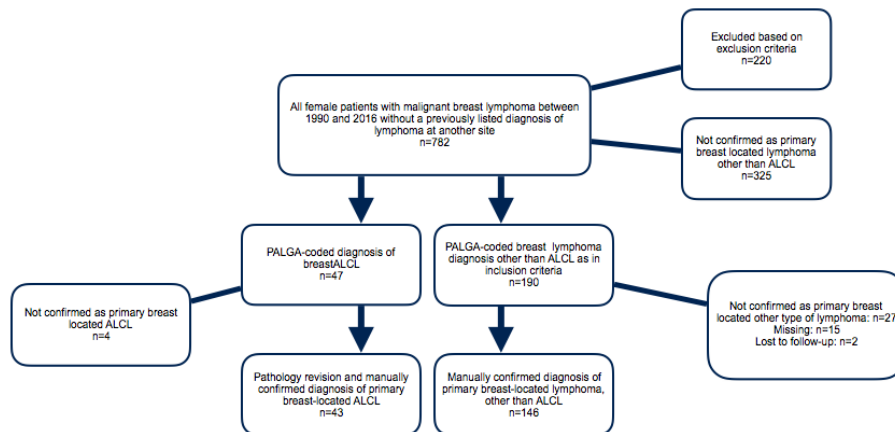

**eFigure 2a: Regional breast implant prevalence in 2015 in women between 20-70 as estimated from 3,000 chest X-rays in two large regional medical centres in the East and South of the Netherlands**

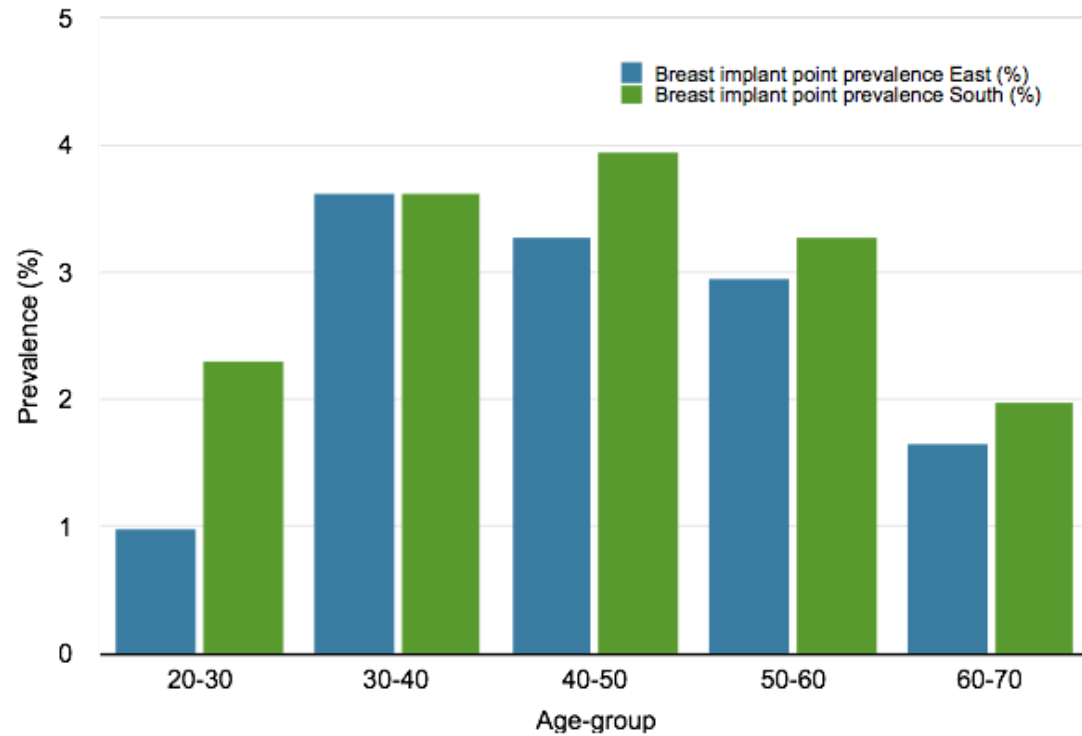

**eFigure 2b: Region-specific breast implant prevalence rates from the National Breast Cancer Screening Program (BCSP)**

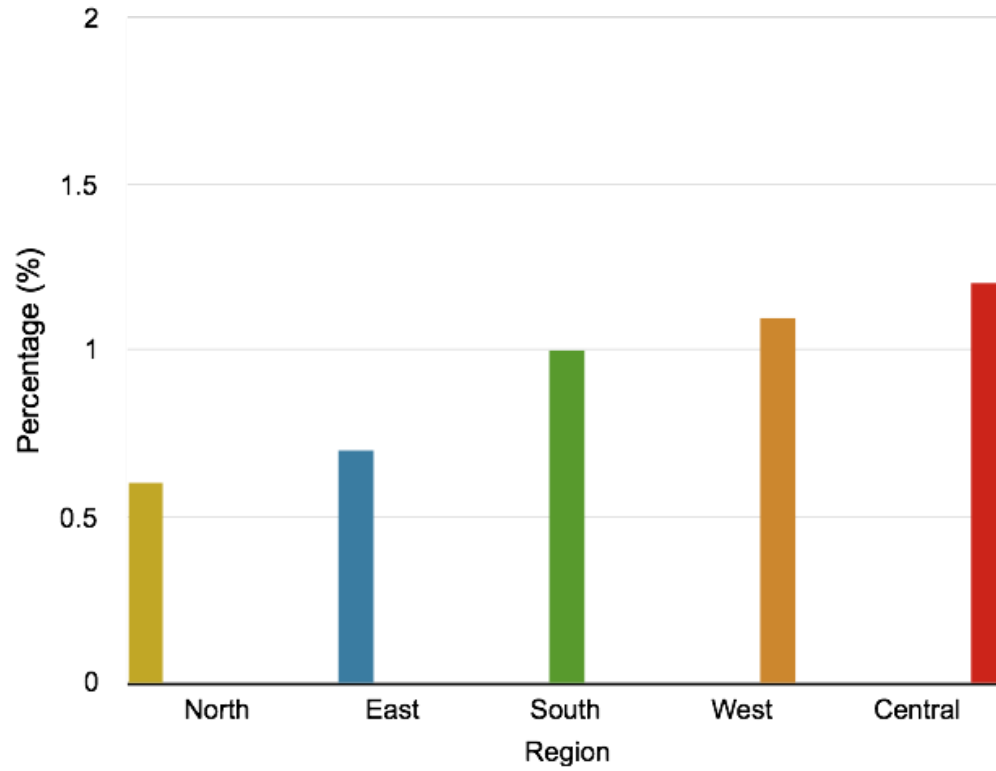

**eFigure 2c: Derived estimation of breast implant prevalence in the Netherlands in 2015 in women between 20-70 years of age**

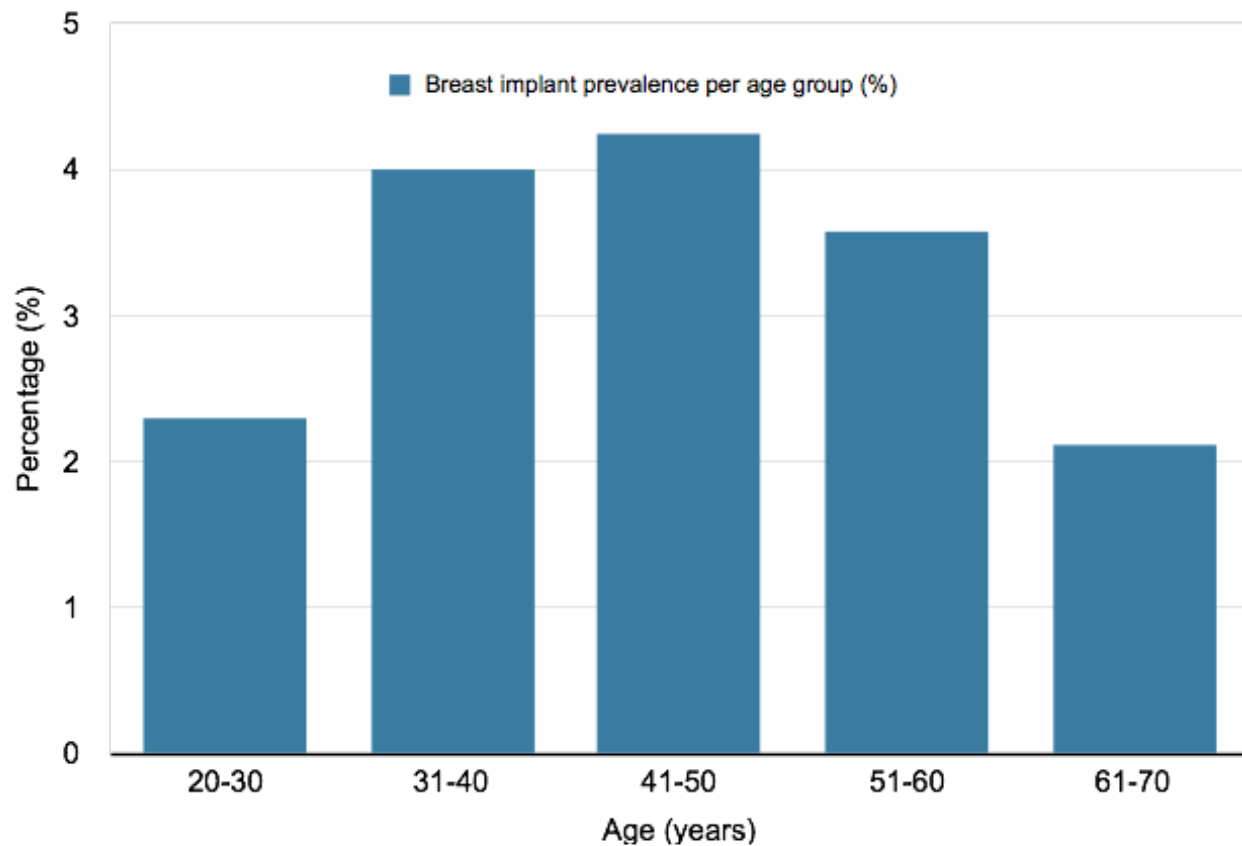

eFigure 3: Estimated number of breast implants sold in the Netherlands by calendar year

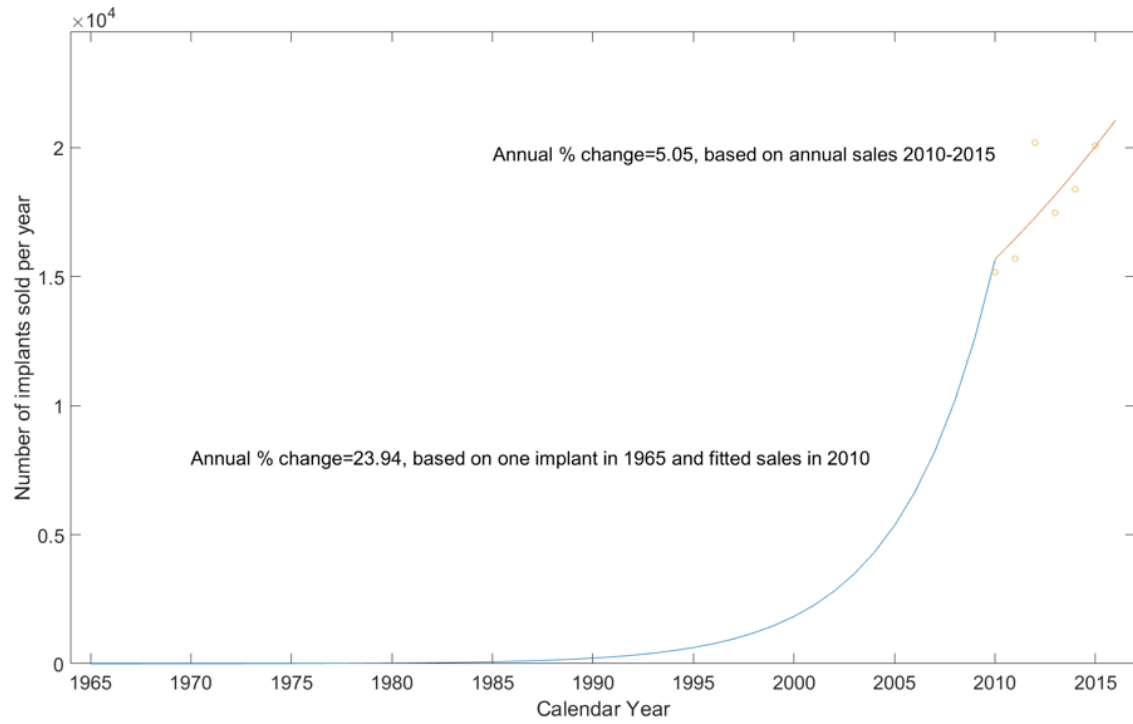

**eFigure 4: Incidence of breast-ALCL in patients with breast implants and reasons for breast implantation**

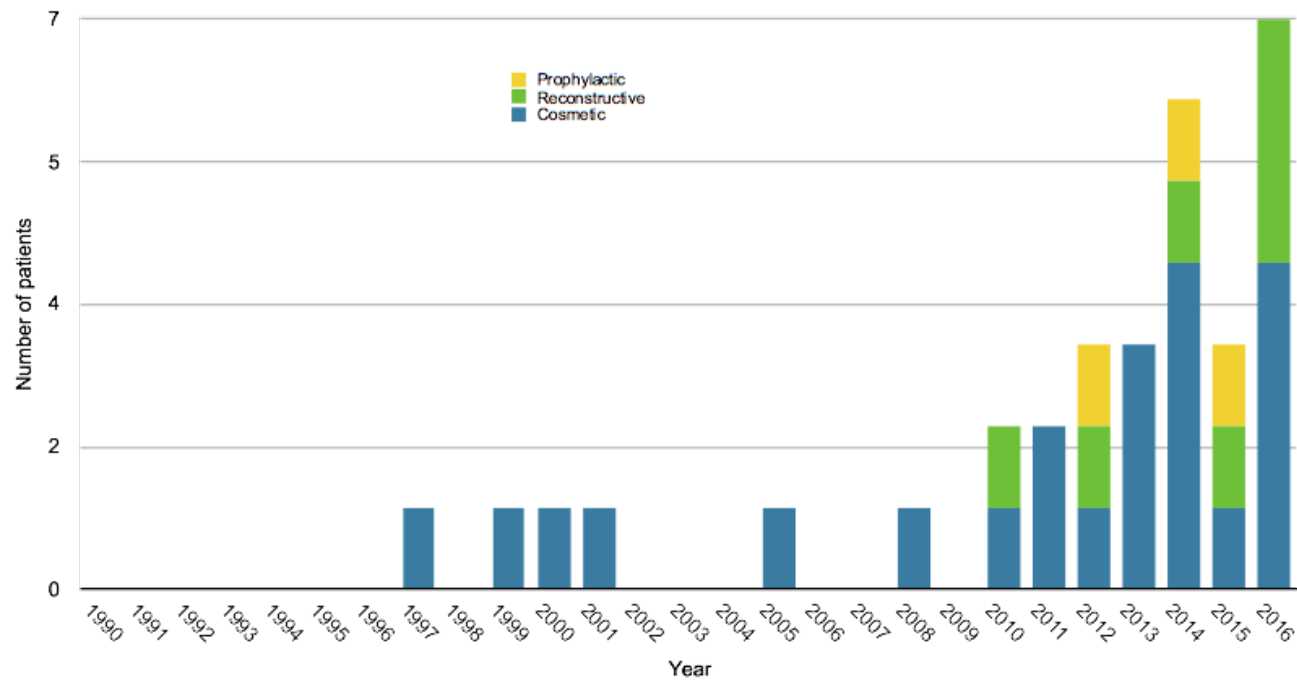

**Figure 5a: Sales data of breast implants in the Netherlands between 2010 and 2015 by surface properties**

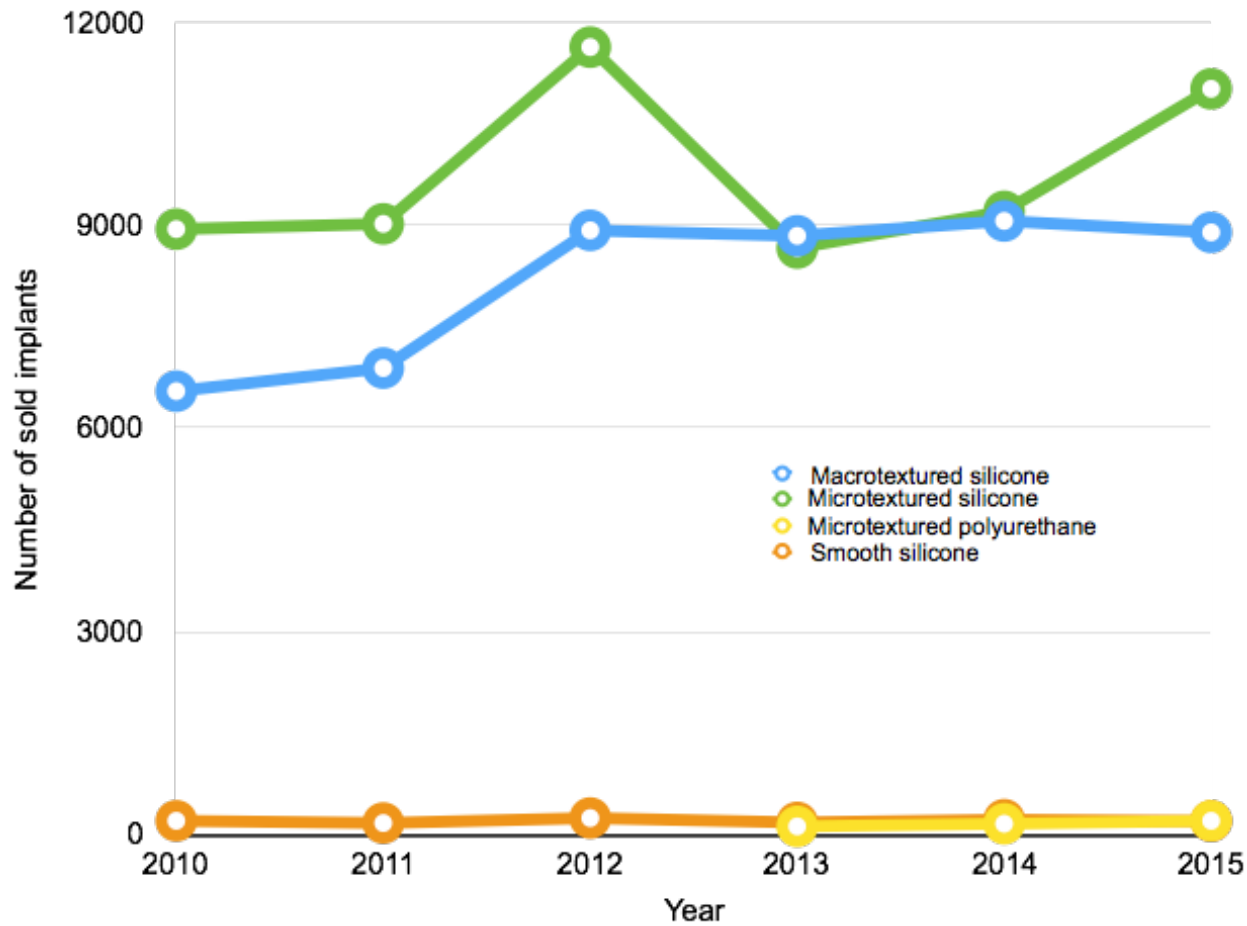

**eFigure 5b: Sales data of breast implants in the Netherlands between 2010 and 2015 by filling properties.**

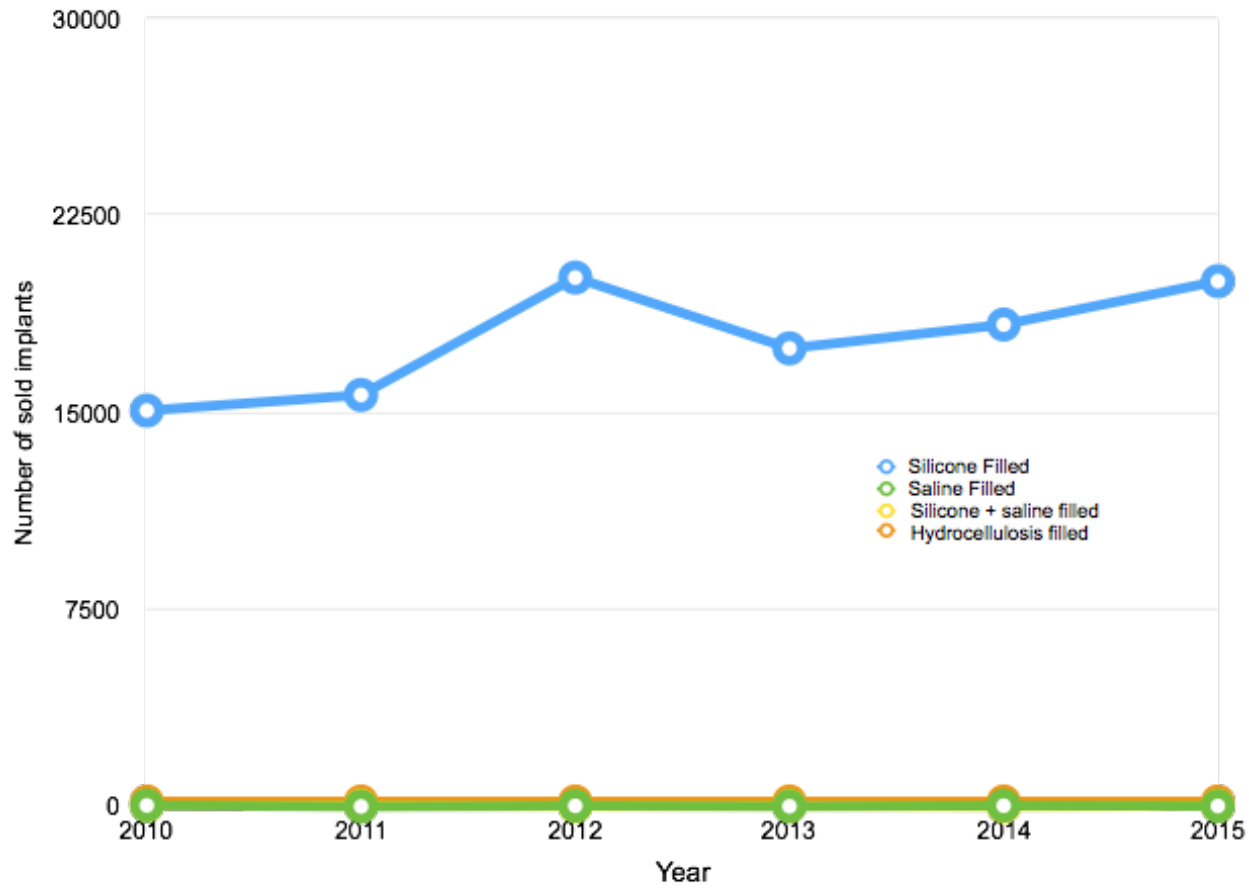

Supplement: jamaoncol-4-335-s001.pdf [file jamaoncol-4-335-s001.pdf]
